# Supplementary material for: MOF-derived, N-doped, hierarchically porous carbon sponges as immobilizers to confine selenium as cathodes for Li–Se batteries with superior storage capacity and perfect cycling stability
Source: Royal Society of Chemistry journal article supplement (doi:10.1039/c5nr00903k), 2015-01-01
Supplement: c5nr00903k1.pdf [file c5nr00903k1.pdf]

## Supporting information

### MOF-Derived N-doped Hierarchically Porous Carbon Sponges As Immobilizer to Confine Selenium as Cathodes for Li-Se Batteries with Superior Storage Capacity and Perfect Cycling Stability

Zhaoqiang Li, Longwei Yin\*

Key Laboratory for Liquid-Solid Structural Evolution and Processing of Materials, Ministry of Education, School of Materials Science and Engineering, Shandong University, Jinan 250061, P. R. China

\*To whom correspondence should be addressed. Tel.: + 86 531 88396970. Fax: + 86 531 88396970. E-mail: [yinlw@sdu.edu.cn](mailto:yinlw@sdu.edu.cn)

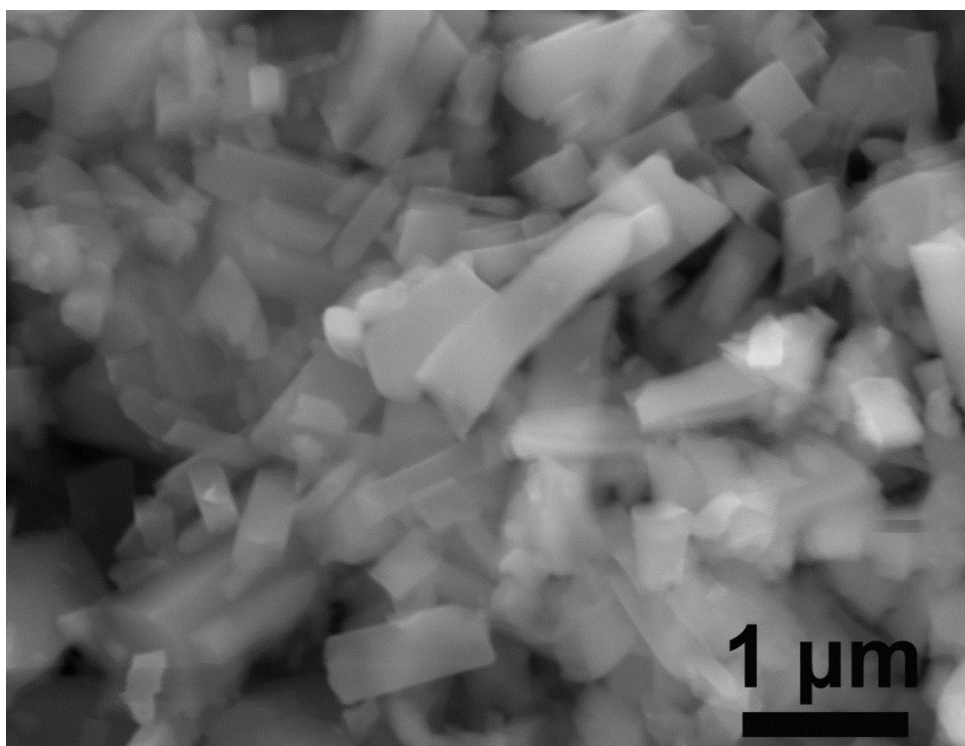

Figure S1. SEM images of the Al-MOF rods.

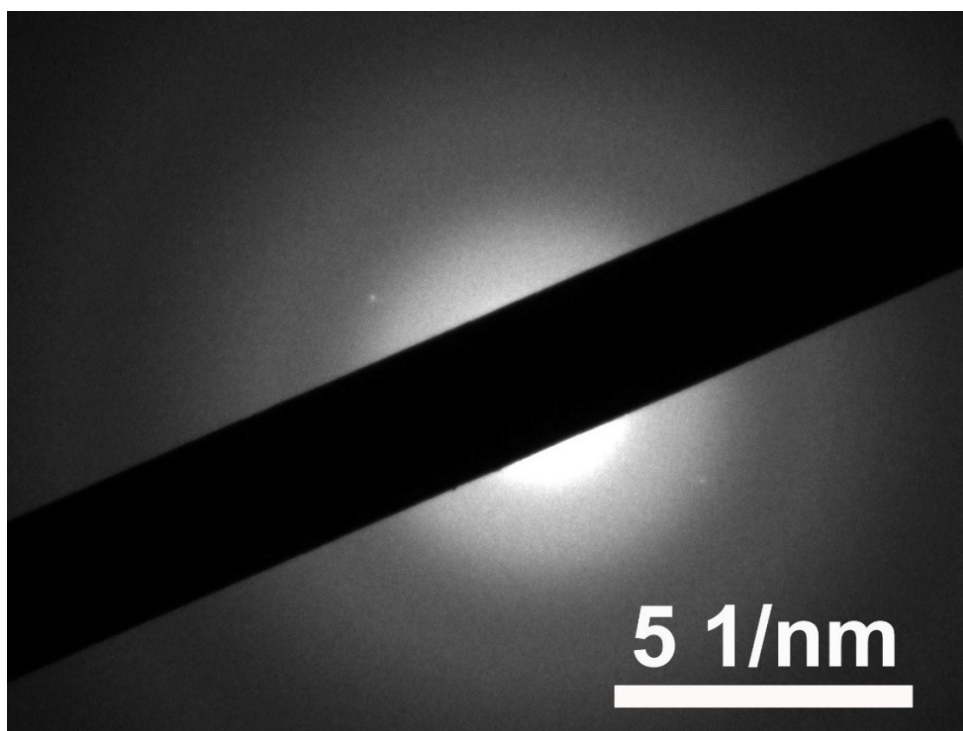

**Figure S2.** The selected area electron diffraction (SAED) pattern of the NCS/Se-50 composite.

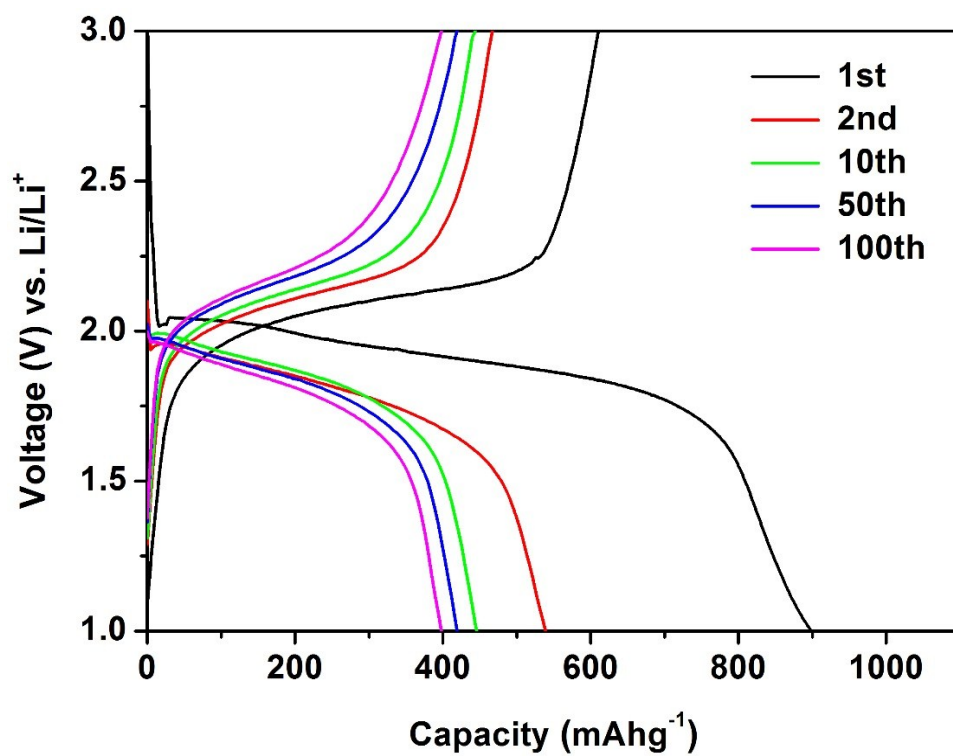

**Figure S3.** Discharge-charge profiles of the CS/Se-50 cathode at a current density of 0.5 C in the voltage range 3.0-1.0 V.
